# Supplementary material for: Immune responses to Mycobacterial heat shock protein 70 accompany self-reactivity to human BiP in rheumatoid arthritis
Source: PubMed Central journal article supplement (PMC4772543; doi:10.1038/srep22486), 2016-03-01
Supplement: srep22486-s1.pdf [file srep22486-s1.pdf]

## **Supplementary information**

**Title: Immune responses to Mycobacterium heat shock protein 70 accompany self-reactivity to human BiP in rheumatoid arthritis.**

**Authors: Hirofumi Shoda, Norio Hanata, Shuji Sumitomo, Tomohisa Okamura, Keishi Fujio, Kazuhiko Yamamoto**

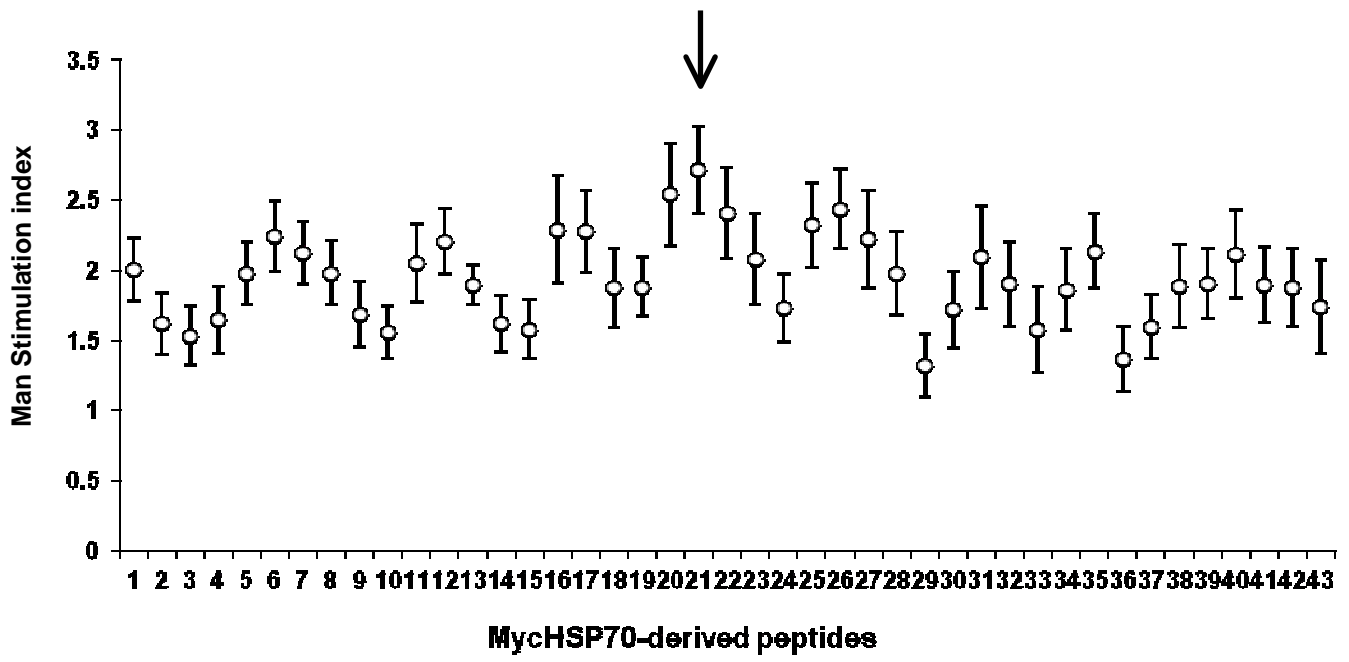

A

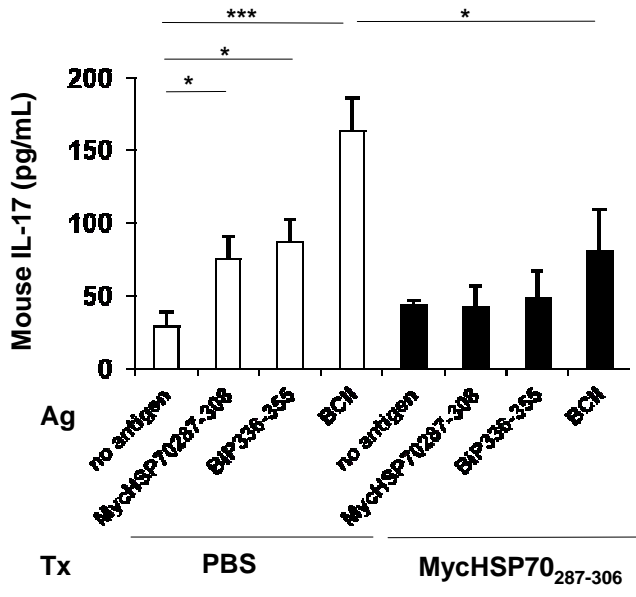

B

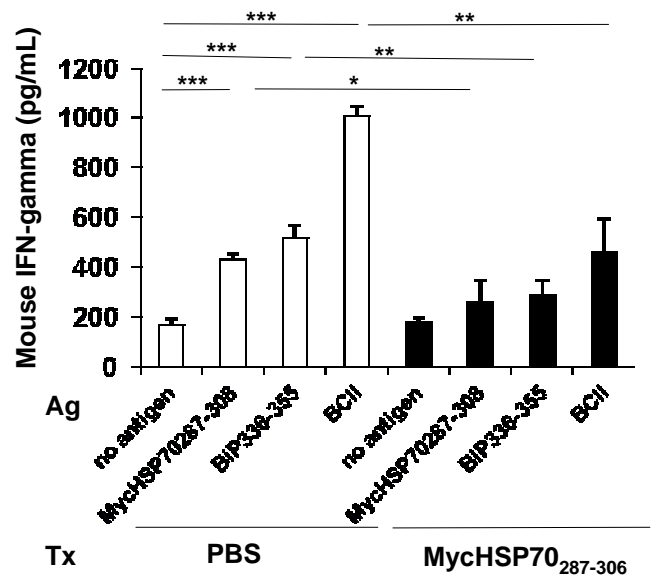

C

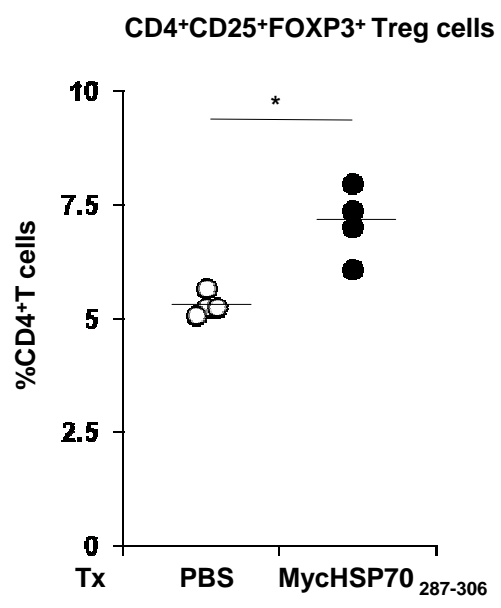

**Supplementary Table S1**

|                           | RA                   | HD          |
|---------------------------|----------------------|-------------|
| N                         | 48                   | 20          |
| Age                       | 55.2 ± 20.1          | 46.1 ± 14.8 |
| Sex (female, male)        | 41, 7                | 15, 5       |
| Disease duration (y)      | 10.8 ± 9.5           | 0           |
| Stage                     | 2.63 ± 1.25          |             |
| Class                     | 1.55 ± 0.63          |             |
| RF positivity (%)         | 70.8                 | 0           |
| ACPA positivity (%)       | 87.5                 | 0           |
| CRP (mg/dL)               | 1.07 ± 1.00          |             |
| ESR (mm/hr)               | 40.3 ± 21.7          |             |
| DAS28-4CRP                | 3.37 ± 0.80          |             |
| DAS28-4ESR                | 4.11 ± 0.86          |             |
| Methotrexate<br>(mg/week) | 8.7 ± 2.3            |             |
| Prednisolone<br>(mg/day)  | 3.5 ± 3.6            |             |
| Biologics user (%)        | IFX 4.2%<br>ETN 6.2% |             |

**Supplementary Table S2**

| <b>Number</b> | <b>Amino acid sequences</b> | <b>Position</b> |
|---------------|-----------------------------|-----------------|
| MycHSP70-1    | MARAVGIDLGTTNSVVSVLE        | 1-20            |
| MycHSP70-2    | VSVLEGGDPVVVANSEGSRT        | 16-35           |
| MycHSP70-3    | EGSRTTPSIVAFARNGEVLV        | 31-50           |
| MycHSP70-4    | GEVLVGQPAKNQAVTNVDRT        | 46-65           |
| MycHSP70-5    | NVDRTVRSVKRHMGSDWSIE        | 61-80           |
| MycHSP70-6    | HMGSDWSIEIDGKKYTAPEI        | 72-91           |
| MycHSP70-7    | TAPEI SARILMKLKRDAEAY       | 87-106          |
| MycHSP70-8    | DAEAY LGEDITDAVITTPAY       | 102-112         |
| MycHSP70-9    | TTPAYFNDAQRQATKDAGQI        | 117-136         |
| MycHSP70-10   | DAGQIAGLNVLRIVNEPTAA        | 132-151         |
| MycHSP70-11   | EPTAAALAYGLDKGEKEQRI        | 147-166         |
| MycHSP70-12   | KEQRILVFDLGGGTFDVSL         | 162-181         |
| MycHSP70-13   | DVSLLEIGEGVVEVRATSGD        | 177-196         |
| MycHSP70-14   | ATSGDNHLGGDDWDQRVVDW        | 192-211         |
| MycHSP70-15   | RVVDW LVDKFKGTSGIDLTK       | 207-226         |

|             |                         |         |
|-------------|-------------------------|---------|
| MycHSP70-16 | IDLTKDKMAMQRLREAAEKA    | 222-241 |
| MycHSP70-17 | AAEKAKIELSSSQSTSINLP    | 237-256 |
| MycHSP70-18 | KIELSSSQST SINLP YITVD  | 237-256 |
| MycHSP70-19 | YITVD ADKNP LFLDE QLTRA | 242-261 |
| MycHSP70-20 | QLTRAEFQRITQDLLDRTRK    | 257-276 |
| MycHSP70-21 | DRTRKPFQSVIADTGISVSE    | 287-306 |
| MycHSP70-22 | ISVSEIDHVVLVGGSTRMPA    | 302-321 |
| MycHSP70-23 | TRMPAVTDLVKELTGGKEPN    | 317-336 |
| MycHSP70-24 | GKEPNKGVNPDEVVAVGAAL    | 332-351 |
| MycHSP70-25 | VGAALQAGVLKGEVKDVLLL    | 347-366 |
| MycHSP70-26 | VKDVLLLDVTPLSLGIETKG    | 360-379 |
| MycHSP70-27 | IETKGGVMTRLIERNTTIPT    | 375-394 |
| MycHSP70-28 | TTIPTKRSETFTTADDNQPS    | 390-409 |
| MycHSP70-29 | DNQPSVQIQVYQGEREIAAH    | 405-424 |
| MycHSP70-30 | EIAAHNKLLGSFELTGIPPA    | 420-439 |
| MycHSP70-31 | GIPPAPRGIPQIEVTFDIDA    | 435-454 |
| MycHSP70-32 | FDIDANGIVHVTAKDKGTGK    | 450-469 |
| MycHSP70-33 | KGTGKENTIRIQEGSGLSKE    | 465-484 |

|             |                      |         |
|-------------|----------------------|---------|
| MycHSP70-34 | SGLSKEDIDRMIKDAEAHAE | 479-498 |
| MycHSP70-35 | EAHAEEDRKRREEADVNRQA | 494-513 |
| MycHSP70-36 | VRNQAETLVYQTEKFVKEQR | 509-528 |
| MycHSP70-37 | VKEQREAEGGSKVPEDTLNK | 524-543 |
| MycHSP70-38 | DTLNKVDAVAEAKAALGGS  | 539-558 |
| MycHSP70-39 | ALGGSDISAIKSAMEKLGQE | 554-573 |
| MycHSP70-40 | KLGQESQALGQAIYEAAQAA | 569-588 |
| MycHSP70-41 | AAQAASQATGAAHPGGEPGG | 584-603 |
| MycHSP70-42 | GEPGGAHPGSADDVVDAEVV | 599-618 |
| MycHSP70-43 | PGSADDVVDAEVVDDGREAK | 606-625 |

### **Supplementary Figure S1**

Proliferation of PBMCs from HLA-DR4-positive RA patients (n = 20) in response to MycHSP70-derived 20-mer peptides (Supplementary Table 2). Stimulation index (S.I.) indicated the proliferation of PBMC from RA patients cultured in the presence of each peptide (10 µg/mL) for 96 hours, which were analyzed by <sup>3</sup>H-thymidine uptake. Black arrow indicates the position of MycHSP70<sub>287-306</sub>.

### **Supplementary Figure S2**

Oral tolerance of MycHSP70<sub>287-306</sub> peptides on collagen-induced arthritis (CIA) model. The experimental protocol was the same as Figure 6. (A)(B) Mouse IL-17 and IFN-gamma concentrations in the splenic CD4<sup>+</sup> T cell culture was measured by ELISA (Mouse cytokine ELISA ready-set-go, eBioscience) according to the manufacture's protocol. (C) The frequencies of splenic regulatory T cells in CIA (n=4, each). FACS analysis was performed by FACS Vantage (BD Bioscience). Cells were stained by anti-mouse CD4 APC antibody, anti-mouse CD25 FITC antibody, FOXP3 staining was performed using anti-mouse Foxp3 PE antibody (eBioscience) by using



Fixation/Permeabilization concentrate and diluent (eBioscience)

(eBioscience) according to the manufacture's protocol. \*:  $p < 0.05$ , \*\*:  $p < 0.01$ ,

\*\*\*:  $p < 0.001$ .

### **Supplementary Table S1**

List of MycHSP70-derived peptides. MycHSP70-derived peptides were designed to be 20-mers long and overlap one another by at least 5-mers.

### **Supplementary Table S2**

Summary of the characteristics of RA patients and healthy donors.
